# Supplementary figures and images for: Auxilin is required for formation of Golgi-derived clathrin-coated vesicles during Drosophila spermatogenesis
Source: Oxford University Press journal article supplement (doi:10.1242/dev.057422), 2011-02-22

A

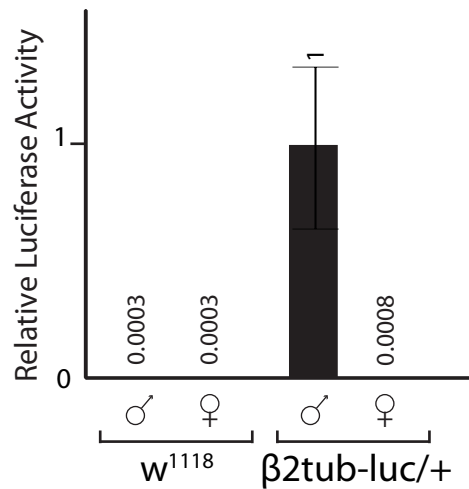

B

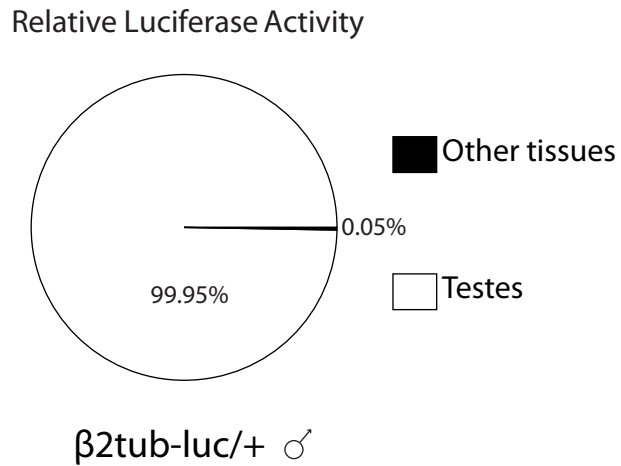

C

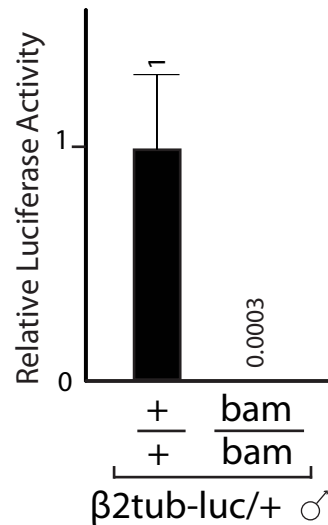

Supplement: dev057422figs1.pdf [file dev057422figs1.pdf]

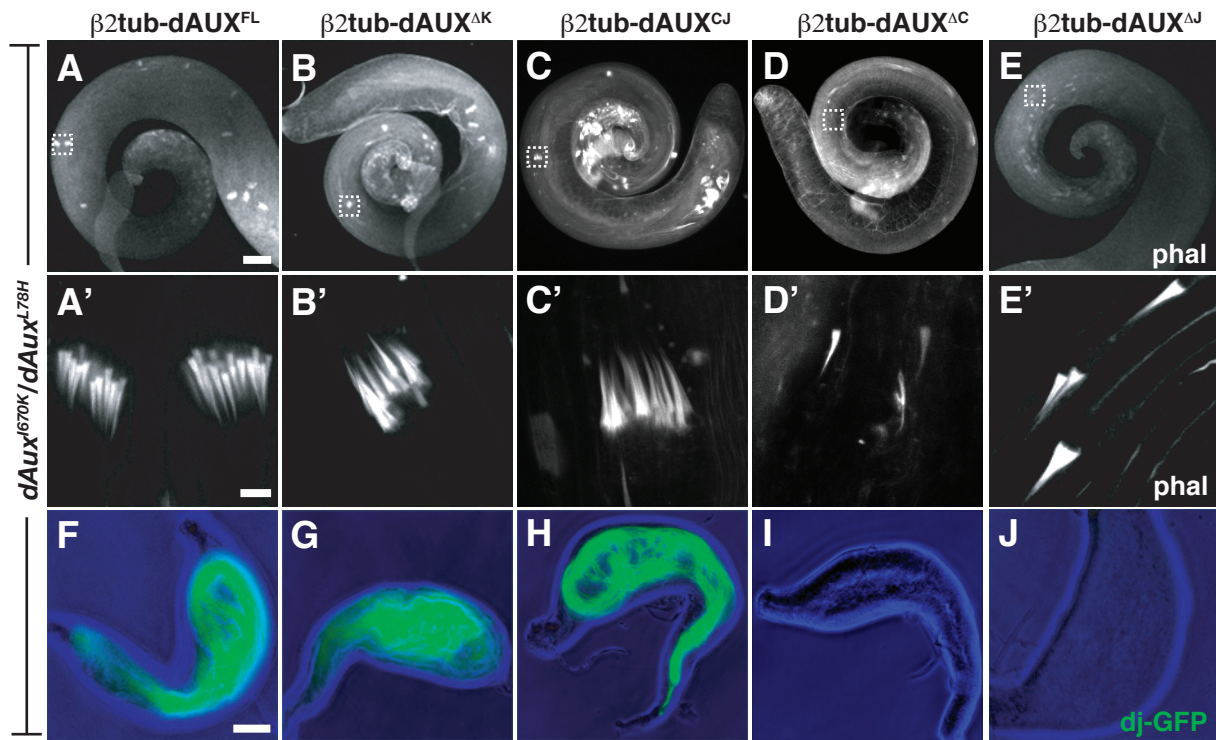

Supplement: dev057422figs2.pdf [file dev057422figs2.pdf]

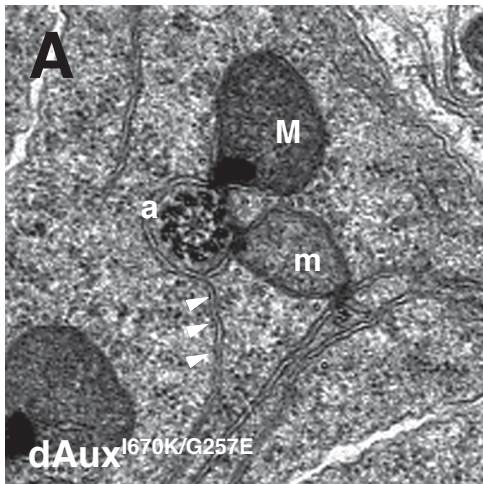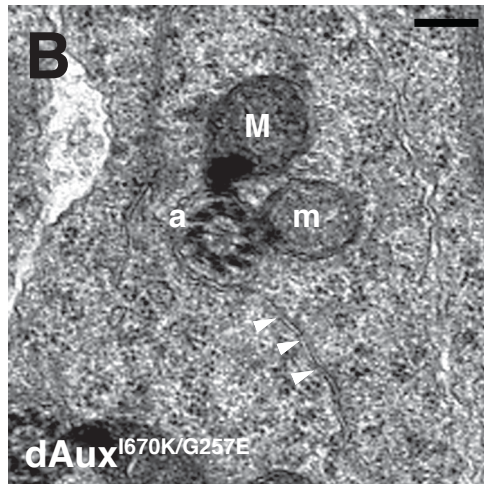

Supplement: dev057422figs3.pdf [file dev057422figs3.pdf]

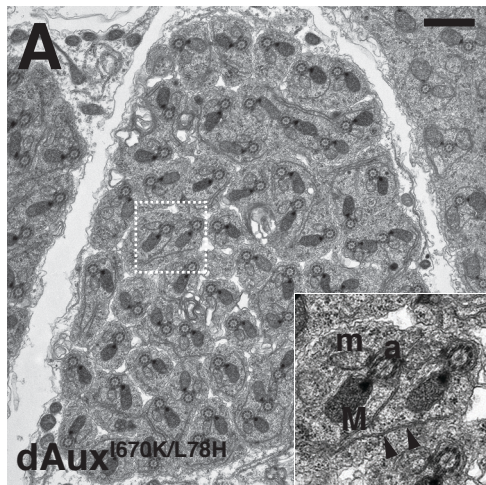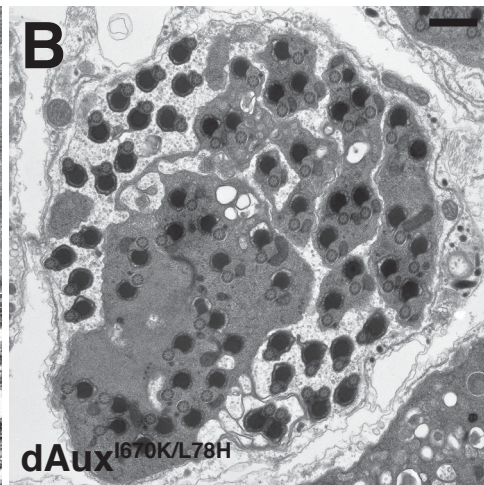

Supplement: dev057422figs4.pdf [file dev057422figs4.pdf]

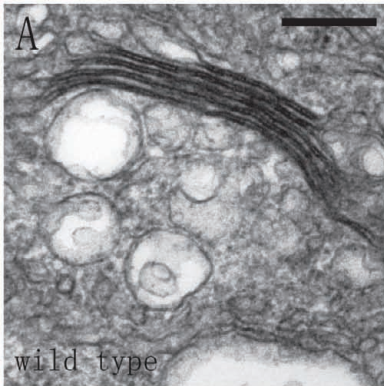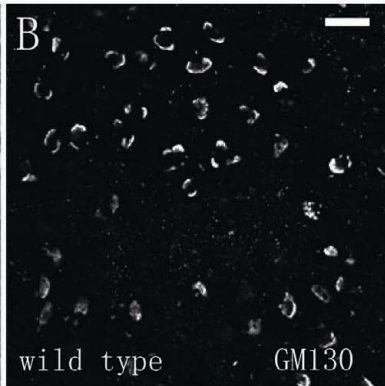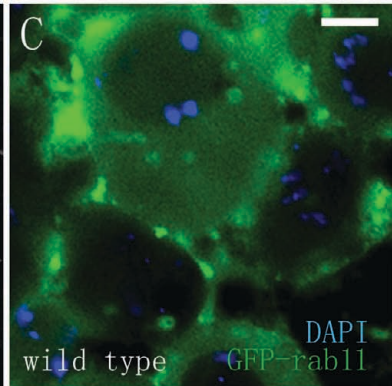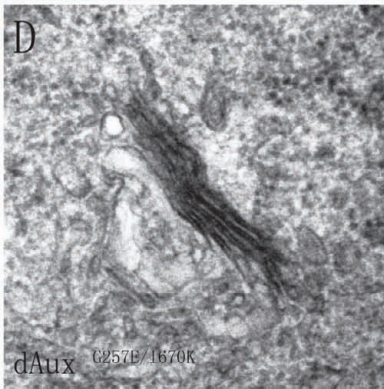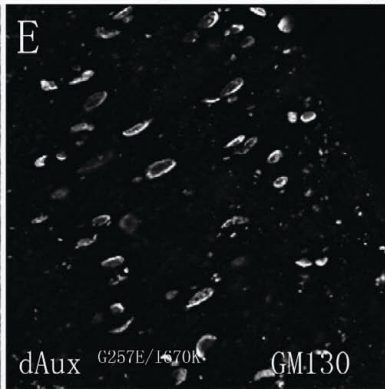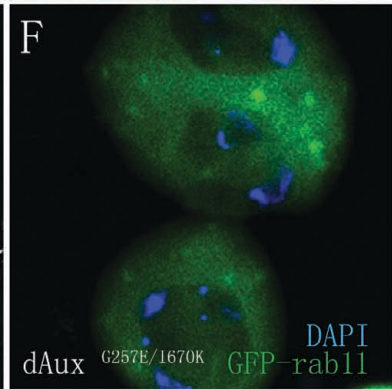

Supplement: dev057422figs5.pdf [file dev057422figs5.pdf]
